# Supplementary material for: Why does a para-amino group make the green fluorescent protein chromophore non-fluorescent: coherent intramolecular charge transfer reduces the Z/E-photoisomerization barrier
Source: Royal Society of Chemistry journal article supplement (doi:10.1039/c9cc04156g), 2019-01-01
Supplement: c9cc04156g1.pdf [file c9cc04156g1.pdf]

## Supporting Information

### **Why Does *para*-amino group make green fluorescent protein chromophore non-fluorescent: coherent intramolecular charge transfer reduces *Z/E*-photoisomerization barrier**

*Yi-Hui Chen, Robert Sung and Kuangsen Sung\**

Department of Chemistry, National Cheng Kung University, Tainan, Taiwan

| <u>Content</u>                                                                                                                                                                                               | <u>Page</u> |
|--------------------------------------------------------------------------------------------------------------------------------------------------------------------------------------------------------------|-------------|
| 1. $^1\text{H}$ - and $^{13}\text{C}$ -NMR spectra of <i>p</i> -ABDI                                                                                                                                         | S2          |
| 2. Cartesian coordinates and energies of the optimized structures for the $S_0$ ground state, the $S_1$ excited-state minima, the conical intersection CI of <i>p</i> -AbDI/ <i>p</i> -ABDI/ <i>p</i> -AAbDI | S3—S14      |

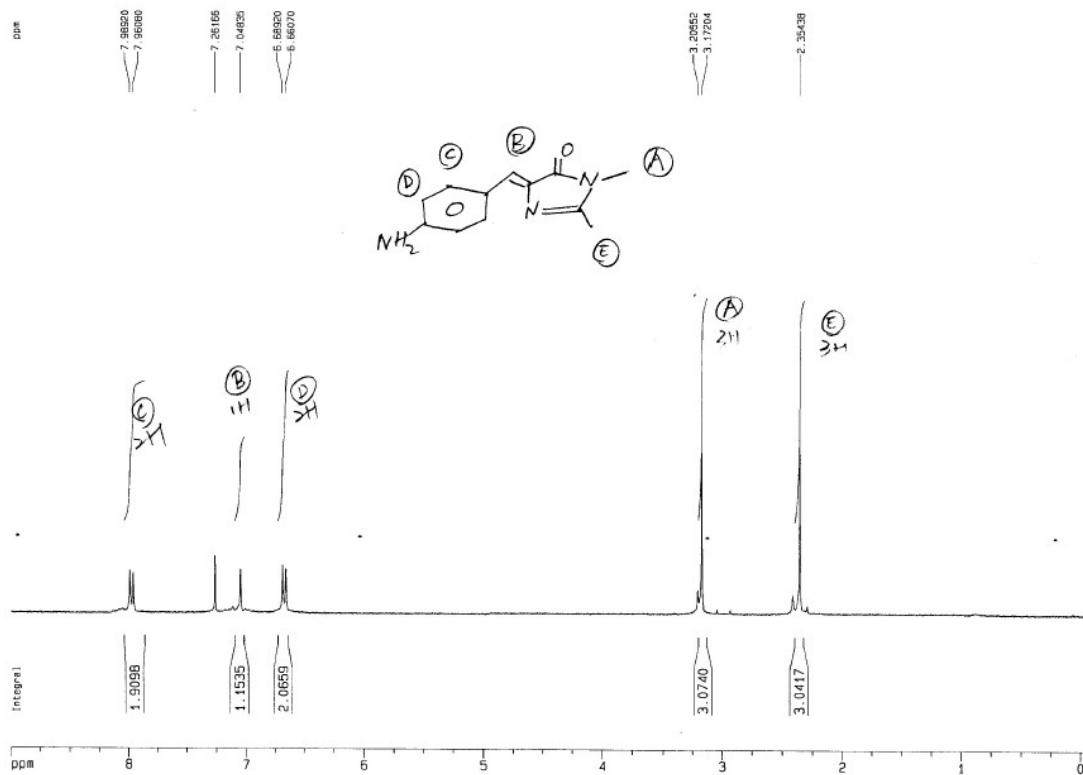

Figure S1. <sup>1</sup>H-NMR spectrum of *p*-ABDI

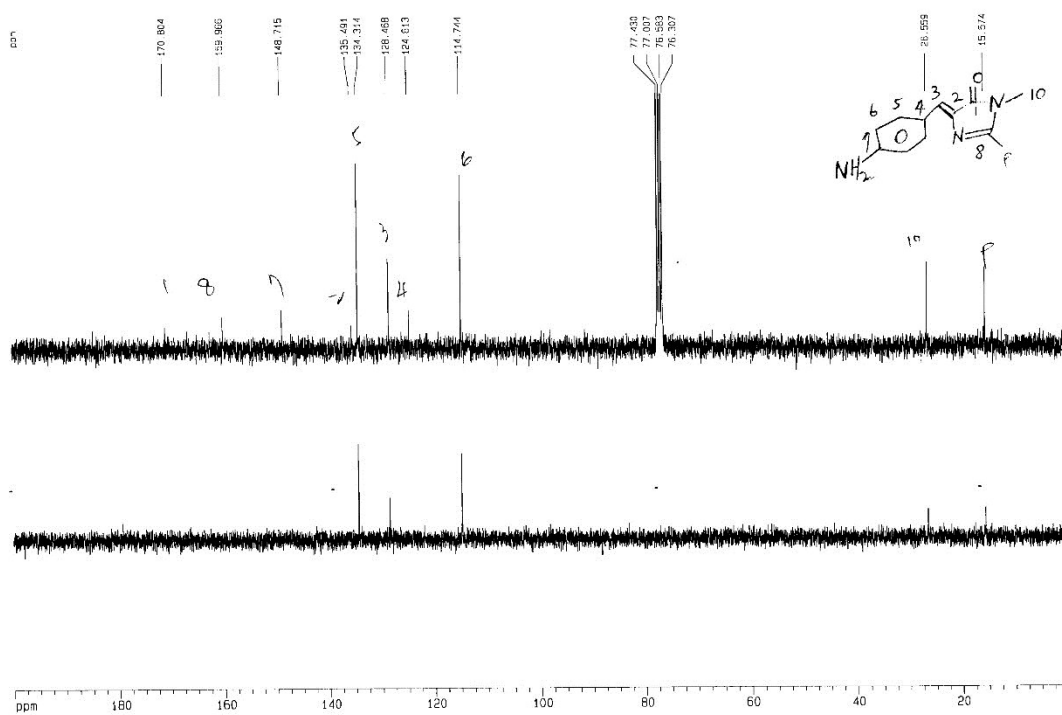

Figure S2. <sup>13</sup>C-NMR spectrum of *p*-ABDI

Compound: ground-state *Z-p*-AbDI

Method/basis set: CASSCF(8, 8)/6-31G\*

Energy of the optimized structure: -622.2345011 Hartree

Cartesian coordinate of the optimized structure:

|   |           |           |           |
|---|-----------|-----------|-----------|
| 6 | -3.517915 | -0.156421 | -0.015386 |
| 6 | -2.575097 | -1.192196 | -0.020873 |
| 6 | -1.215758 | -0.919220 | -0.017080 |
| 6 | -0.752507 | 0.406308  | -0.008844 |
| 6 | -1.707356 | 1.428787  | -0.007373 |
| 6 | -3.057480 | 1.159887  | -0.010795 |
| 1 | -2.911926 | -2.214425 | -0.034396 |
| 1 | -1.381902 | 2.454406  | -0.002590 |
| 1 | -3.764691 | 1.971315  | -0.015775 |
| 6 | 0.661772  | 0.784651  | -0.001920 |
| 1 | 0.855170  | 1.844018  | 0.000287  |
| 6 | 1.762154  | 0.035916  | 0.002158  |
| 7 | 1.869350  | -1.379452 | 0.000704  |
| 6 | 3.127969  | 0.627983  | 0.008540  |
| 7 | 3.938803  | -0.482522 | 0.009383  |
| 6 | 3.142609  | -1.618015 | 0.004499  |
| 8 | 3.476867  | 1.770716  | 0.012236  |
| 1 | -0.513322 | -1.727929 | -0.019874 |
| 7 | -4.883223 | -0.437712 | -0.069558 |
| 1 | -5.469074 | 0.280076  | 0.299464  |
| 1 | -5.137069 | -1.328280 | 0.300595  |
| 1 | 4.932007  | -0.448965 | 0.012140  |
| 1 | 3.576214  | -2.597616 | 0.004358  |

Compound: ground-state *E-p*-AbDI

Method/basis set: CASSCF(8, 8)/6-31G\*

Energy of the optimized structure: -622.202649 Hartree

Cartesian coordinate of the optimized structure:

|   |          |          |          |
|---|----------|----------|----------|
| 6 | 2.63568  | 0.43433  | -0.06239 |
| 6 | 1.56598  | 1.34394  | -0.07397 |
| 6 | 0.25533  | 0.90545  | -0.05706 |
| 6 | -0.03908 | -0.4713  | -0.03031 |
| 6 | 1.02806  | -1.36018 | -0.02444 |
| 6 | 2.34884  | -0.92855 | -0.03917 |
| 1 | 1.7711   | 2.40011  | -0.10209 |
| 1 | 0.83566  | -2.41859 | -0.0064  |
| 1 | 3.1492   | -1.64769 | -0.03948 |
| 6 | -1.37973 | -1.0551  | -0.01026 |
| 1 | -1.3753  | -2.13175 | -0.00575 |
| 6 | -2.62319 | -0.56165 | 0.00443  |
| 7 | -3.72471 | -1.46535 | 0.02178  |
| 6 | -3.16767 | 0.82785  | 0.00933  |
| 7 | -4.52177 | 0.61945  | 0.02831  |
| 6 | -4.77643 | -0.74693 | 0.03465  |
| 8 | -2.63411 | 1.90103  | 0.00051  |
| 1 | -5.77977 | -1.12247 | 0.04899  |
| 1 | -5.18847 | 1.35645  | 0.03525  |
| 7 | 3.95086  | 0.89098  | -0.12833 |
| 1 | 4.08971  | 1.81244  | 0.2265   |
| 1 | -0.5397  | 1.62118  | -0.0634  |
| 1 | 4.63068  | 0.26     | 0.23769  |

Compound: ES1 (The first S<sub>1</sub> excited-state minimum of *p*-AbDI)

Method/basis set: CASSCF(8, 8)/6-31G\*

Energy of the optimized structure: -622.0563606 Hartree

Cartesian coordinate of the optimized structure:

|   |           |           |           |
|---|-----------|-----------|-----------|
| 6 | -3.382176 | -0.190232 | 0.013711  |
| 6 | -2.386733 | 0.524360  | 0.791559  |
| 6 | -1.083632 | 0.295863  | 0.656306  |
| 6 | -0.583184 | -0.733207 | -0.297510 |
| 6 | -1.595731 | -1.494545 | -1.022990 |
| 6 | -2.929696 | -1.247631 | -0.871511 |
| 1 | -2.730246 | 1.265825  | 1.493615  |
| 1 | -1.266877 | -2.269317 | -1.692083 |
| 1 | -3.656909 | -1.828663 | -1.410449 |
| 6 | 0.759342  | -1.012419 | -0.524568 |
| 1 | 0.994338  | -1.782182 | -1.236821 |
| 6 | 1.942971  | -0.408470 | 0.066248  |
| 7 | 2.011801  | 0.554992  | 0.972838  |
| 6 | 3.310332  | -0.852452 | -0.322304 |
| 7 | 4.114112  | -0.052604 | 0.446291  |
| 6 | 3.331595  | 0.782138  | 1.213083  |
| 8 | 3.647891  | -1.691792 | -1.104697 |
| 1 | -0.368592 | 0.844765  | 1.233076  |
| 7 | -4.740171 | -0.019565 | 0.275609  |
| 1 | -5.339054 | -0.270817 | -0.483063 |
| 1 | -4.980728 | 0.886780  | 0.619130  |
| 1 | 3.713750  | 1.499352  | 1.902215  |
| 1 | 5.107278  | -0.090649 | 0.429805  |

Compound: ES2 (The second S<sub>1</sub> excited-state minimum of *p*-AbDI)

Method/basis set: CASSCF(8, 8)/6-31G\*

Energy of the optimized structure: -622.087084 Hartree

Cartesian coordinate of the optimized structure:

|   |           |           |           |
|---|-----------|-----------|-----------|
| 6 | -1.585200 | -2.401787 | -3.242379 |
| 6 | -0.441171 | -1.578167 | -3.475818 |
| 6 | 0.278751  | -1.100793 | -2.423493 |
| 6 | -0.098459 | -1.408528 | -1.073098 |
| 6 | -1.246568 | -2.233965 | -0.874737 |
| 6 | -1.971453 | -2.715422 | -1.917121 |
| 1 | -0.160305 | -1.354553 | -4.488776 |
| 1 | -1.536347 | -2.476455 | 0.131236  |
| 1 | -2.832892 | -3.337136 | -1.754811 |
| 6 | 0.628901  | -0.945224 | 0.005411  |
| 1 | 0.249841  | -1.266858 | 0.971596  |
| 6 | 1.813727  | -0.114324 | -0.072752 |
| 7 | 1.755872  | 1.280872  | 0.009294  |
| 6 | 3.134282  | -0.589802 | -0.059568 |
| 7 | 3.861547  | 0.597667  | -0.016950 |
| 6 | 2.988820  | 1.661869  | 0.037089  |
| 8 | 3.626474  | -1.716764 | -0.093118 |
| 1 | 1.146557  | -0.490048 | -2.569504 |
| 7 | -2.281507 | -2.870044 | -4.275653 |
| 1 | -3.073006 | -3.457626 | -4.143709 |
| 1 | -2.013805 | -2.670194 | -5.212400 |
| 1 | 4.852751  | 0.626430  | 0.028919  |
| 1 | 3.321749  | 2.678616  | 0.084860  |

Compound: The conical intersection CI of *p*-AbDI

Method/basis set: CASSCF(8,8)/6-31G\*

Energy of the optimized structure: -622.076625 Hartree

Cartesian coordinate of the optimized structure:

|   |           |           |           |
|---|-----------|-----------|-----------|
| 6 | -1.585667 | -2.511249 | -3.271155 |
| 6 | -0.447799 | -1.699777 | -3.636210 |
| 6 | 0.313125  | -1.162598 | -2.660496 |
| 6 | -0.011726 | -1.383325 | -1.273092 |
| 6 | -1.146329 | -2.189620 | -0.948359 |
| 6 | -1.926739 | -2.742266 | -1.903696 |
| 1 | -0.229600 | -1.562843 | -4.678675 |
| 1 | -1.373360 | -2.354956 | 0.088209  |
| 1 | -2.778221 | -3.352379 | -1.670319 |
| 6 | 0.782671  | -0.867815 | -0.291404 |
| 1 | 0.437952  | -1.143667 | 0.709996  |
| 6 | 1.968025  | -0.057336 | -0.510217 |
| 7 | 1.841860  | 1.332511  | -0.157843 |
| 6 | 3.172916  | -0.561255 | -0.082509 |
| 7 | 3.895592  | 0.602939  | 0.213854  |
| 6 | 3.020532  | 1.669855  | 0.220903  |
| 8 | 3.635468  | -1.717162 | 0.040456  |
| 1 | 1.186116  | -0.568011 | -2.837279 |
| 7 | -2.305875 | -3.042154 | -4.214613 |
| 1 | -3.095411 | -3.615983 | -4.009275 |
| 1 | -2.086239 | -2.901446 | -5.177310 |
| 1 | 4.808974  | 0.579256  | 0.601488  |
| 1 | 3.336774  | 2.668490  | 0.452987  |

Compound: ground-state *Z-p*-ABDI

Method/basis set: CASSCF(8, 8)/6-31G\*

Energy of the optimized structure: -700.2855465 Hartree

Cartesian coordinate of the optimized structure:

|   |           |           |           |
|---|-----------|-----------|-----------|
| 6 | -3.513402 | -0.154953 | -0.014123 |
| 6 | -2.555211 | -1.192825 | -0.018675 |
| 6 | -1.210636 | -0.911082 | -0.013263 |
| 6 | -0.749841 | 0.426285  | -0.006336 |
| 6 | -1.701089 | 1.425449  | -0.005950 |
| 6 | -3.068982 | 1.149034  | -0.007628 |
| 1 | -2.889044 | -2.216110 | -0.034710 |
| 1 | -1.387039 | 2.454916  | -0.000993 |
| 1 | -3.776822 | 1.959759  | -0.009837 |
| 6 | 0.666408  | 0.807278  | 0.000072  |
| 1 | 0.861165  | 1.865802  | 0.002226  |
| 6 | 1.776702  | 0.043258  | 0.003486  |
| 7 | 1.884406  | -1.362820 | 0.001488  |
| 6 | 3.150640  | 0.618127  | 0.008896  |
| 7 | 3.956998  | -0.492304 | 0.008634  |
| 6 | 3.137198  | -1.626923 | 0.004178  |
| 8 | 3.508261  | 1.759718  | 0.012850  |
| 1 | -0.501019 | -1.713895 | -0.015766 |
| 7 | -4.867162 | -0.467722 | -0.067376 |
| 1 | -5.477380 | 0.255073  | 0.247570  |
| 1 | -5.111243 | -1.348166 | 0.331645  |
| 6 | 5.400290  | -0.445105 | 0.012037  |
| 1 | 5.811346  | -0.921365 | -0.870464 |
| 1 | 5.687628  | 0.594968  | 0.014721  |
| 1 | 5.807360  | -0.924830 | 0.894526  |
| 6 | 3.718579  | -3.002241 | 0.002821  |
| 1 | 4.339016  | -3.161995 | -0.873206 |
| 1 | 4.334989  | -3.165559 | 0.881047  |
| 1 | 2.913301  | -3.722638 | -0.000611 |



Compound: ES1 (The first S<sub>1</sub> excited-state minimum of *p*-ABDI)

Method/basis set: CASSCF(8, 8)/6-31G\*

Energy of the optimized structure: -700.1268941916 Hartree

Cartesian coordinate of the optimized structure:

|   |           |           |           |
|---|-----------|-----------|-----------|
| 6 | -3.366418 | -0.211173 | 0.039421  |
| 6 | -2.384674 | 0.519080  | 0.805190  |
| 6 | -1.076461 | 0.295431  | 0.661053  |
| 6 | -0.582500 | -0.723249 | -0.286679 |
| 6 | -1.608463 | -1.488816 | -1.019585 |
| 6 | -2.909386 | -1.248843 | -0.859786 |
| 1 | -2.732008 | 1.260272  | 1.505285  |
| 1 | -1.278754 | -2.258253 | -1.694801 |
| 1 | -3.642684 | -1.824557 | -1.398414 |
| 6 | 0.755393  | -1.001194 | -0.516146 |
| 1 | 0.979764  | -1.771721 | -1.232131 |
| 6 | 1.958407  | -0.409266 | 0.064103  |
| 7 | 2.030994  | 0.557438  | 0.977426  |
| 6 | 3.297189  | -0.840967 | -0.314978 |
| 7 | 4.120926  | -0.044260 | 0.453346  |
| 6 | 3.339786  | 0.784768  | 1.219221  |
| 8 | 3.653439  | -1.690806 | -1.109232 |
| 1 | -0.360180 | 0.850206  | 1.231388  |
| 7 | -4.720930 | -0.012552 | 0.251567  |
| 1 | -5.313483 | -0.272458 | -0.508198 |
| 1 | -4.967616 | 0.885173  | 0.610716  |
| 6 | 3.864321  | 1.792700  | 2.180768  |
| 1 | 3.027901  | 2.299625  | 2.642278  |
| 1 | 4.460837  | 1.332893  | 2.964661  |
| 1 | 4.486648  | 2.536326  | 1.689317  |
| 6 | 5.563247  | -0.105412 | 0.426225  |
| 1 | 5.986952  | 0.842717  | 0.116448  |
| 1 | 5.959737  | -0.367714 | 1.400086  |
| 1 | 5.846518  | -0.865847 | -0.284814 |

Compound: ES2 (The second S<sub>1</sub> excited-state minimum of *p*-ABDI)

Method/basis set: CASSCF(8, 8)/6-31G\*

Energy of the optimized structure: -700.1612273719 Hartree

Cartesian coordinate of the optimized structure:

|   |           |           |           |
|---|-----------|-----------|-----------|
| 6 | -1.583411 | -2.403692 | -3.241696 |
| 6 | -0.437195 | -1.584550 | -3.478670 |
| 6 | 0.283840  | -1.104117 | -2.428240 |
| 6 | -0.094527 | -1.404249 | -1.076958 |
| 6 | -1.244486 | -2.225329 | -0.874783 |
| 6 | -1.970570 | -2.709889 | -1.915304 |
| 1 | -0.155469 | -1.366374 | -4.492596 |
| 1 | -1.535154 | -2.462209 | 0.132287  |
| 1 | -2.833761 | -3.328433 | -1.750101 |
| 6 | 0.634109  | -0.936612 | -0.000390 |
| 1 | 0.252505  | -1.252847 | 0.967018  |
| 6 | 1.819271  | -0.107687 | -0.081621 |
| 7 | 1.764989  | 1.288048  | 0.000175  |
| 6 | 3.136131  | -0.578426 | -0.051274 |
| 7 | 3.876127  | 0.605962  | 0.003397  |
| 6 | 2.997156  | 1.673983  | 0.040946  |
| 8 | 3.631020  | -1.706889 | -0.078975 |
| 1 | 1.153535  | -0.496460 | -2.576040 |
| 7 | -2.281126 | -2.874912 | -4.273200 |
| 1 | -3.074326 | -3.459519 | -4.138597 |
| 1 | -2.012768 | -2.680118 | -5.210777 |
| 6 | 3.451883  | 3.095961  | 0.110582  |
| 1 | 4.046302  | 3.287890  | 1.000592  |
| 1 | 4.058537  | 3.372001  | -0.749027 |
| 1 | 2.581319  | 3.738111  | 0.135647  |
| 6 | 5.311430  | 0.639506  | 0.045338  |
| 1 | 5.726643  | 1.182035  | -0.799604 |
| 1 | 5.677173  | 1.098880  | 0.959335  |
| 1 | 5.653647  | -0.383644 | 0.007478  |

Compound: The conical intersection CI of *p*-ABDI

Method/basis set: CASSCF(8,8)/6-31G\*

Energy of the optimized structure: -700.150718998 Hartree

Cartesian coordinate of the optimized structure:

|   |           |           |           |
|---|-----------|-----------|-----------|
| 6 | -1.552532 | -2.491833 | -3.291652 |
| 6 | -0.399665 | -1.729316 | -3.614466 |
| 6 | 0.335273  | -1.207276 | -2.601303 |
| 6 | -0.029822 | -1.396703 | -1.231548 |
| 6 | -1.207951 | -2.175972 | -0.925878 |
| 6 | -1.957348 | -2.706636 | -1.910630 |
| 1 | -0.127203 | -1.598695 | -4.644300 |
| 1 | -1.476873 | -2.325426 | 0.102705  |
| 1 | -2.836777 | -3.292250 | -1.719420 |
| 6 | 0.781448  | -0.867772 | -0.271764 |
| 1 | 0.439236  | -1.107382 | 0.739914  |
| 6 | 1.976652  | -0.076341 | -0.521024 |
| 7 | 1.847441  | 1.321382  | -0.181797 |
| 6 | 3.169203  | -0.567050 | -0.043668 |
| 7 | 3.887809  | 0.595406  | 0.280827  |
| 6 | 3.013815  | 1.669012  | 0.225033  |
| 8 | 3.633300  | -1.719612 | 0.099575  |
| 1 | 1.232223  | -0.636249 | -2.743521 |
| 7 | -2.275337 | -3.024202 | -4.233531 |
| 1 | -3.084427 | -3.569960 | -4.029845 |
| 1 | -2.035810 | -2.910312 | -5.195262 |
| 6 | 3.437650  | 3.069514  | 0.543814  |
| 1 | 3.853319  | 3.151621  | 1.545662  |
| 1 | 4.192433  | 3.438400  | -0.148033 |
| 1 | 2.573246  | 3.718375  | 0.478232  |
| 6 | 5.247975  | 0.581910  | 0.727751  |
| 1 | 5.890438  | 1.195174  | 0.099291  |
| 1 | 5.348708  | 0.932435  | 1.753280  |
| 1 | 5.582281  | -0.443978 | 0.679856  |

Compound: ground-state *Z-p*-AAbDI

Method/basis set: CASSCF(8, 8)/6-31G\*

Energy of the optimized structure: -734.9568018 Hartree

Cartesian coordinate of the optimized structure:

|   |          |          |          |
|---|----------|----------|----------|
| 6 | 2.53969  | -0.11386 | -1.46095 |
| 6 | 1.53615  | -1.09932 | -1.5166  |
| 6 | 0.25909  | -0.82678 | -1.11717 |
| 6 | -0.08222 | 0.45516  | -0.63796 |
| 6 | 0.91217  | 1.41204  | -0.58884 |
| 6 | 2.22444  | 1.15056  | -0.99356 |
| 1 | 1.77922  | -2.08335 | -1.87981 |
| 1 | 0.68067  | 2.39853  | -0.22777 |
| 1 | 2.96955  | 1.91493  | -0.94219 |
| 6 | -1.4256  | 0.82936  | -0.19086 |
| 1 | -1.53118 | 1.84563  | 0.14853  |
| 6 | -2.54889 | 0.11835  | -0.13266 |
| 7 | -2.75861 | -1.23677 | -0.49856 |
| 6 | -3.83099 | 0.69342  | 0.36148  |
| 7 | -4.70052 | -0.36594 | 0.24804  |
| 6 | -4.01232 | -1.45778 | -0.25772 |
| 8 | -4.08355 | 1.79003  | 0.76092  |
| 1 | -4.50579 | -2.39379 | -0.42507 |
| 1 | -5.66214 | -0.32845 | 0.49626  |
| 7 | 3.82419  | -0.4894  | -1.8939  |
| 1 | 3.9144   | -1.43021 | -2.20557 |
| 6 | 4.95908  | 0.25459  | -1.94576 |
| 1 | 5.79574  | -0.32775 | -2.33194 |
| 8 | 5.08208  | 1.39575  | -1.62548 |
| 1 | -0.48988 | -1.59086 | -1.16756 |

Compound: ES (The second S<sub>1</sub> excited-state minimum of *p*-AAbDI)

Method/basis set: CASSCF(8, 8)/6-31G\*

Energy of the optimized structure: -734.7447974041 Hartree

Cartesian coordinate of the optimized structure:

|   |          |          |          |
|---|----------|----------|----------|
| 6 | 2.68958  | -0.40951 | 0.00169  |
| 6 | 1.65089  | -1.37043 | 0.00477  |
| 6 | 0.35068  | -0.99469 | 0.00262  |
| 6 | -0.0088  | 0.42217  | -0.00289 |
| 6 | 1.09458  | 1.37515  | -0.00583 |
| 6 | 2.3837   | 0.99098  | -0.00371 |
| 1 | 1.90818  | -2.41525 | 0.00876  |
| 1 | 0.85542  | 2.42299  | -0.0099  |
| 1 | 3.17877  | 1.70393  | -0.00591 |
| 6 | -1.29671 | 0.85539  | -0.00538 |
| 1 | -1.47858 | 1.91589  | -0.00828 |
| 6 | -2.5463  | 0.05943  | -0.00312 |
| 7 | -2.65856 | -1.30336 | -0.01657 |
| 6 | -3.83561 | 0.67784  | 0.01141  |
| 7 | -4.6814  | -0.42716 | 0.00501  |
| 6 | -3.92705 | -1.55714 | -0.01118 |
| 8 | -4.1797  | 1.8482   | 0.02433  |
| 1 | -4.35745 | -2.53714 | -0.0181  |
| 1 | -5.67314 | -0.36535 | 0.01165  |
| 7 | 3.97719  | -0.88644 | 0.00397  |
| 1 | 4.06505  | -1.87949 | 0.00764  |
| 6 | 5.17217  | -0.20403 | 0.00194  |
| 1 | 6.01353  | -0.89358 | 0.00473  |
| 8 | 5.31151  | 0.97455  | -0.00237 |
| 1 | -0.44016 | -1.71671 | 0.00422  |

Compound: The conical intersection CI of *p*-AAbDI

Method/basis set: CASSCF(8,8)/6-31G\*

Energy of the optimized structure: -734.7940202 Hartree

Cartesian coordinate of the optimized structure:

|   |           |           |           |
|---|-----------|-----------|-----------|
| 6 | -2.367557 | 0.618350  | 1.626607  |
| 6 | -1.355253 | -0.150630 | 2.228090  |
| 6 | -0.092222 | -0.142941 | 1.705968  |
| 6 | 0.197513  | 0.647511  | 0.575611  |
| 6 | -0.833429 | 1.406754  | -0.015999 |
| 6 | -2.104358 | 1.406752  | 0.490782  |
| 1 | -1.584423 | -0.745581 | 3.093124  |
| 1 | -0.613469 | 2.003895  | -0.882392 |
| 1 | -2.882546 | 1.984934  | 0.044569  |
| 6 | 1.518144  | 0.708911  | 0.093021  |
| 1 | 1.621163  | 1.388452  | -0.755678 |
| 6 | 2.605442  | -0.095724 | 0.549338  |
| 7 | 2.585257  | -0.858866 | -0.710881 |
| 6 | 3.925461  | 0.444918  | 0.693144  |
| 7 | 4.680111  | -0.351207 | -0.189788 |
| 6 | 3.825340  | -0.997531 | -1.038441 |
| 8 | 4.406027  | 1.317238  | 1.388605  |
| 1 | 4.178569  | -1.643554 | -1.819190 |
| 1 | 5.665470  | -0.272789 | -0.289838 |
| 7 | -3.612110 | 0.552141  | 2.206513  |
| 1 | -3.682942 | -0.035226 | 3.008681  |
| 6 | -4.784112 | 1.182764  | 1.840166  |
| 1 | -5.596200 | 0.917407  | 2.512689  |
| 8 | -4.925907 | 1.920103  | 0.924765  |
| 1 | 0.714756  | -0.717939 | 2.114531  |
